# Supplementary material for: The Predictive Power of Regression Models to Determine Grass Weed Infestations in Cereals Based on Drone Imagery—Statistical and Practical Aspects
Source: MDPI journal article supplement (doi:10.3390/agronomy11112277), 2021-11-11
Supplement: s1 [file s1]

Supplementary material for:

**The predictive power of regression models to determine grass weed infestations in cereals based on drone imagery – statistical and practical aspects**

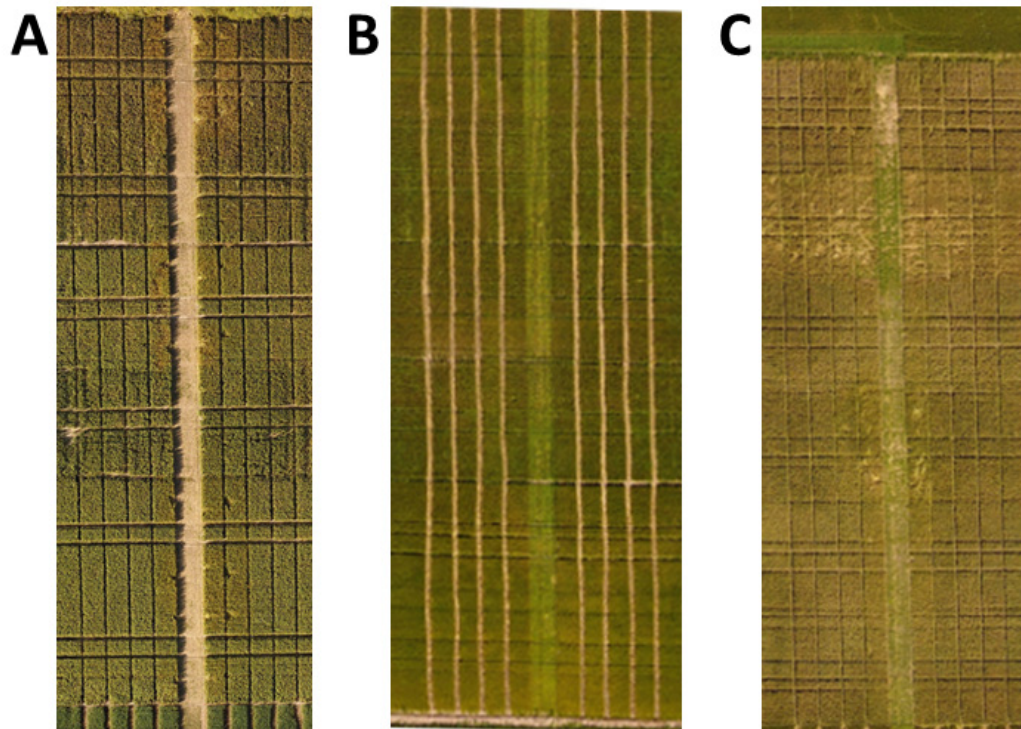

Figure S1. Orthomosaic from UAV imaging of selected fields to illustrate the visible plot variability due to weed infestations. A: Field 2. B: Field 3. C: Field 4.

Table S1: AIC differences (AIC – min AIC) for the prediction models based on all data for each field for different vegetation indices and different functional form of the vegetation index. Min AIC for each field is marked as bold.

| Vegetation index | Functional form | Field 1     | Field 2     | Field 3     | Field 4     | Field 5     | Field 6     |
|------------------|-----------------|-------------|-------------|-------------|-------------|-------------|-------------|
| Blue             | Lin             | 2.55        | 39.82       | 1.20        | 35.29       | 9.34        | <b>0.00</b> |
|                  | Exp             | <b>0.00</b> | 35.59       | 28.86       | 34.40       | 75.93       | 42.72       |
|                  | Log             | 2.93        | 39.59       | 1.55        | 35.29       | 23.95       | 4.35        |
| ExG              | Lin             | 3.52        | 39.02       | 23.10       | 35.05       | 40.56       | 5.80        |
|                  | Exp             | 3.55        | 39.07       | 22.97       | 35.05       | 42.16       | 6.49        |
|                  | Log             | 3.44        | 38.60       | 23.53       | 35.02       | 26.33       | 2.70        |
| Red index        | Lin             | 6.19        | 9.68        | 16.72       | <b>0.00</b> | 26.34       | 18.04       |
|                  | Exp             | 2.88        | 34.65       | 30.62       | 30.21       | 78.52       | 45.86       |
|                  | Log             | 6.22        | 14.18       | 16.02       | 1.28        | 34.70       | -           |
| R/B              | Lin             | 3.20        | 5.14        | 4.85        | 30.54       | 63.59       | 46.80       |
|                  | Exp             | 3.40        | <b>0.00</b> | 28.90       | 31.70       | 76.49       | 47.23       |
|                  | Log             | 3.11        | 7.17        | <b>0.00</b> | 30.30       | 57.58       | 46.58       |
| NDI              | Lin             | 5.61        | 20.43       | 29.56       | 31.81       | 72.43       | 22.30       |
|                  | Exp             | 5.63        | 20.64       | 29.54       | 31.84       | 72.47       | 22.98       |
|                  | Log             | -           | -           | -           | -           | -           | -           |
| ExG - ExR        | Lin             | 5.08        | 30.84       | 29.75       | 33.90       | 27.09       | 20.94       |
|                  | Exp             | 7.31        | 39.16       | 29.72       | 31.84       | 86.33       | 52.76       |
|                  | Log             | -           | -           | -           | -           | -           | -           |
| R+G+B            | Lin             | 4.32        | 33.54       | 28.87       | 26.27       | <b>0.00</b> | 0.79        |
|                  | Exp             | 6.30        | 34.71       | 30.62       | 30.90       | 75.94       | 48.69       |
|                  | Log             | 4.42        | 33.90       | 29.00       | 26.37       | 8.10        | 5.43        |

Table S2: RMSE for the prediction models based on all data for each field for different vegetation indices and different functional form of the vegetation index. Min RMSE for each field is marked as bold.

| Vegetation index | Functional form | Field 1     | Field 2      | Field 3      | Field 4       | Field 5       | Field 6      |
|------------------|-----------------|-------------|--------------|--------------|---------------|---------------|--------------|
| Blue             | Lin             | 1.68        | 143.92       | <b>95.21</b> | 439.22        | 449.09        | 80.10        |
|                  | Exp             | 1.69        | 156.49       | 149.99       | 431.32        | >10000        | 120.85       |
|                  | Log             | 1.69        | 142.87       | 96.49        | 439.43        | 535.10        | 84.76        |
| ExG              | Lin             | 1.66        | 146.42       | 121.63       | 434.83        | 624.91        | 85.16        |
|                  | Exp             | 1.66        | 146.43       | 121.22       | 434.88        | 633.12        | 85.99        |
|                  | Log             | <b>1.65</b> | 146.28       | 123.00       | 433.71        | 545.25        | 81.25        |
| Red index        | Lin             | 1.76        | 122.12       | 111.77       | <b>311.60</b> | 551.02        | 96.45        |
|                  | Exp             | 1.89        | 3204.22      | >10000       | 538.85        | 2001.59       | 185.15       |
|                  | Log             | -           | -            | -            | -             | -             | -            |
| R/B              | Lin             | 1.71        | 102.74       | 101.10       | 398.01        | 782.01        | 112.07       |
|                  | Exp             | 1.72        | <b>91.56</b> | 130.35       | 411.61        | 807.40        | 112.04       |
|                  | Log             | 1.71        | 106.36       | 96.70        | 396.05        | 751.20        | 112.46       |
| NDI              | Lin             | 1.73        | 123.29       | 128.15       | 424.09        | 704.33        | 99.68        |
|                  | Exp             | 1.73        | 123.70       | 128.11       | 424.25        | 704.81        | 100.35       |
|                  | Log             | -           | -            | -            | -             | -             | -            |
| ExG - ExR        | Lin             | 1.72        | 134.05       | 132.98       | 442.18        | 569.47        | 95.03        |
|                  | Exp             | 3.88        | 143.07       | 176.26       | 433.96        | 769.93        | 135.54       |
|                  | Log             | -           | -            | -            | -             | -             | -            |
| R+G+B            | Lin             | 1.70        | 137.89       | 125.01       | 409.21        | <b>400.11</b> | <b>79.91</b> |
|                  | Exp             | 1.98        | >10000       | >10000       | 529.38        | >10000        | 114.15       |
|                  | Log             | 1.71        | 138.84       | 125.37       | 409.74        | 444.02        | 84.68        |

Table S3: Average  $R^2$  for training sets of different strategies for selecting a subset of data to train the linear prediction model. Results are given for different percentages (number of plots) used as training sets.

| Field | VI        | Random selection |          |          | Selection from extremes |          | Selection from the whole range |          |          |
|-------|-----------|------------------|----------|----------|-------------------------|----------|--------------------------------|----------|----------|
|       |           | 10% (6)          | 20% (12) | 30% (18) | 10% (6)                 | 20% (12) | 8% (5)                         | 16% (10) | 25% (15) |
| 1     | Blue      | 0.24             | 0.14     | 0.11     | 0.29                    | 0.16     | 0.32                           | 0.19     | 0.17     |
| 2     | R/B       | 0.47             | 0.45     | 0.45     | 0.56                    | 0.50     | 0.55                           | 0.51     | 0.51     |
| 3     | Blue      | 0.46             | 0.41     | 0.40     | 0.82                    | 0.80     | 0.53                           | 0.50     | 0.49     |
| 4     | Red index | 0.49             | 0.46     | 0.46     | 0.64                    | 0.59     | 0.57                           | 0.50     | 0.47     |
| 5     | R+G+B     | 0.62             | 0.69     | 0.74     | 0.84                    | 0.82     | 0.80                           | 0.81     | 0.80     |
| 6     | Blue      | 0.68             | 0.62     | 0.59     | 0.91                    | 0.90     | 0.63                           | 0.60     | 0.59     |

Table S4: Average RMSE for the training sets of different strategies for selecting a subset of data to train the prediction model. Results are given for different percentages (number of plots) used as training sets.

| Field | VI        | Random selection |          |          | Selection from extremes |          | Selection from the whole range |          |          |
|-------|-----------|------------------|----------|----------|-------------------------|----------|--------------------------------|----------|----------|
|       |           | 10% (6)          | 20% (12) | 30% (18) | 10% (6)                 | 20% (12) | 8% (5)                         | 16% (10) | 25% (15) |
| 1     | Blue      | 1.61             | 2.05     | 2.21     | 3.90                    | 3.13     | 2.76                           | 3.11     | 3.17     |
| 2     | R/B       | 96.78            | 120.68   | 129.48   | 178.69                  | 162.69   | 129.62                         | 144.95   | 149.01   |
| 3     | Blue      | 94.88            | 107.49   | 112.45   | 75.99                   | 86.04    | 94.88                          | 102.24   | 105.52   |
| 4     | Red index | 291.63           | 345.64   | 359.27   | 372.94                  | 414.03   | 301.63                         | 342.12   | 359.35   |
| 5     | R+G+B     | 335.40           | 453.15   | 482.34   | 573.16                  | 667.39   | 350.41                         | 462.41   | 494.99   |
| 6     | Blue      | 68.15            | 83.61    | 90.55    | 55.19                   | 61.24    | 86.75                          | 92.38    | 94.89    |

Table S5: Sensitivity, specificity, and balanced accuracy in the training sets for different strategies for selecting a subset of data to train the linear prediction model to describe the association between vegetation index and grass weed density. Results are given for different percentages (number of plots) used as training sets.

|             | Field | VI    | Random selection |          |          | Selection from extremes |          | Selection from the whole range |          |          |
|-------------|-------|-------|------------------|----------|----------|-------------------------|----------|--------------------------------|----------|----------|
|             |       |       | 10% (6)          | 20% (12) | 30% (18) | 10% (6)                 | 20% (12) | 8% (5)                         | 16% (10) | 25% (15) |
| Sensitivity |       |       |                  |          |          |                         |          |                                |          |          |
|             | 1     | Blue  | 0.61             | 0.62     | 0.63     | 0.59                    | 0.56     | 0.66                           | 0.64     | 0.64     |
|             | 2     | R/B   | 0.64             | 0.78     | 0.83     | 0.69                    | 0.80     | 0.80                           | 0.87     | 0.90     |
|             | 3     | Blue  | 1                | 1        | 1        | 0.99                    | 1        | 0.99                           | 1        | 1        |
|             | 4     | Red   | 0.89             | 0.88     | 0.86     | 0.86                    | 0.90     | 0.74                           | 0.79     | 0.80     |
|             | 5     | R+G+B | 0.69             | 0.74     | 0.78     | 0.81                    | 0.92     | 0.75                           | 0.80     | 0.81     |
|             | 6     | Blue  | 0.88             | 0.90     | 0.92     | 0.89                    | 0.95     | 0.86                           | 0.89     | 0.91     |
| Specificity |       |       |                  |          |          |                         |          |                                |          |          |
|             | 1     | Blue  | 0.75             | 0.67     | 0.66     | 0.90                    | 0.74     | 0.84                           | 0.70     | 0.67     |
|             | 2     | R/B   | 0.82             | 0.77     | 0.76     | 0.91                    | 0.84     | 0.85                           | 0.78     | 0.76     |
|             | 3     | Blue  | -                | -        | -        | -                       | -        | -                              | -        | -        |
|             | 4     | Red   | 0.84             | 0.75     | 0.73     | 0.92                    | 0.87     | 0.88                           | 0.81     | 0.77     |
|             | 5     | R+B+G | 0.84             | 0.78     | 0.80     | 0.96                    | 0.97     | 0.91                           | 0.80     | 0.78     |
|             | 6     | Blue  | 0.79             | 0.77     | 0.76     | 0.90                    | 0.82     | 0.79                           | 0.76     | 0.76     |
| Accuracy    |       |       |                  |          |          |                         |          |                                |          |          |
|             | All   |       | 0.81             | 0.81     | 0.81     | 0.87                    | 0.87     | 0.84                           | 0.82     | 0.82     |

Table S6: Sensitivity, specificity, and balanced accuracy in the training sets for different strategies for selecting a subset of data to train the prediction model using a logistic regression model to describe the association between vegetation index and probability of grass weed density. Results are given for different percentages (number of plots) used as training sets.

|             |       | Random selection |         |          | Selection from extremes |         | Selection from the whole range |        |          |          |
|-------------|-------|------------------|---------|----------|-------------------------|---------|--------------------------------|--------|----------|----------|
|             | Field | VI               | 10% (6) | 20% (12) | 30% (18)                | 10% (6) | 20% (12)                       | 8% (5) | 16% (10) | 25% (15) |
| Sensitivity |       |                  |         |          |                         |         |                                |        |          |          |
|             | 1     | Blue             | 0.47    | 0.48     | 0.46                    | 0.45    | 0.46                           | 0.48   | 0.51     | 0.48     |
|             | 2     | R/B              | 0.49    | 0.58     | 0.61                    | 0.61    | 0.71                           | 0.56   | 0.62     | 0.63     |
|             | 3     | Blue             | 1       | 1        | 1                       | 1       | 1                              | 1      | 1        | 1        |
|             | 4     | Red              | 0.81    | 0.70     | 0.63                    | 0.75    | 0.65                           | 0.45   | 0.47     | 0.48     |
|             | 5     | R+G+B            | 0.51    | 0.49     | 0.49                    | 0.57    | 0.63                           | 0.45   | 0.50     | 0.49     |
|             | 6     | Blue             | 0.81    | 0.86     | 0.88                    | 0.77    | 0.83                           | 0.73   | 0.84     | 0.87     |
| Specificity |       |                  |         |          |                         |         |                                |        |          |          |
|             | 1     | Blue             | 0.83    | 0.75     | 0.72                    | 0.86    | 0.79                           | 1      | 0.85     | 0.81     |
|             | 2     | R/B              | 0.86    | 0.80     | 0.78                    | 0.93    | 0.93                           | 1      | 0.90     | 0.87     |
|             | 3     | Blue             | -       | -        | -                       | -       | -                              | -      | -        | -        |
|             | 4     | Red              | 0.98    | 0.95     | 0.94                    | 1       | 1                              | 1      | 0.90     | 0.85     |
|             | 5     | R+B+G            | 0.88    | 0.79     | 0.77                    | 1       | 1                              | 1      | 0.84     | 0.78     |
|             | 6     | Blue             | 1       | 1        | 1                       | 1       | 1                              | 1      | 1        | 1        |
| Accuracy    |       |                  |         |          |                         |         |                                |        |          |          |
|             | All   |                  | 0.80    | 0.78     | 0.77                    | 0.83    | 0.83                           | 0.81   | 0.79     | 0.77     |
